# Supplementary material for: Machine Learning Techniques for Phenology Assessment of Sugarcane Using Conjunctive SAR and Optical Data
Source: MDPI journal article supplement (doi:10.3390/rs14143249), 2022-07-06
Supplement: s1 [file s1]

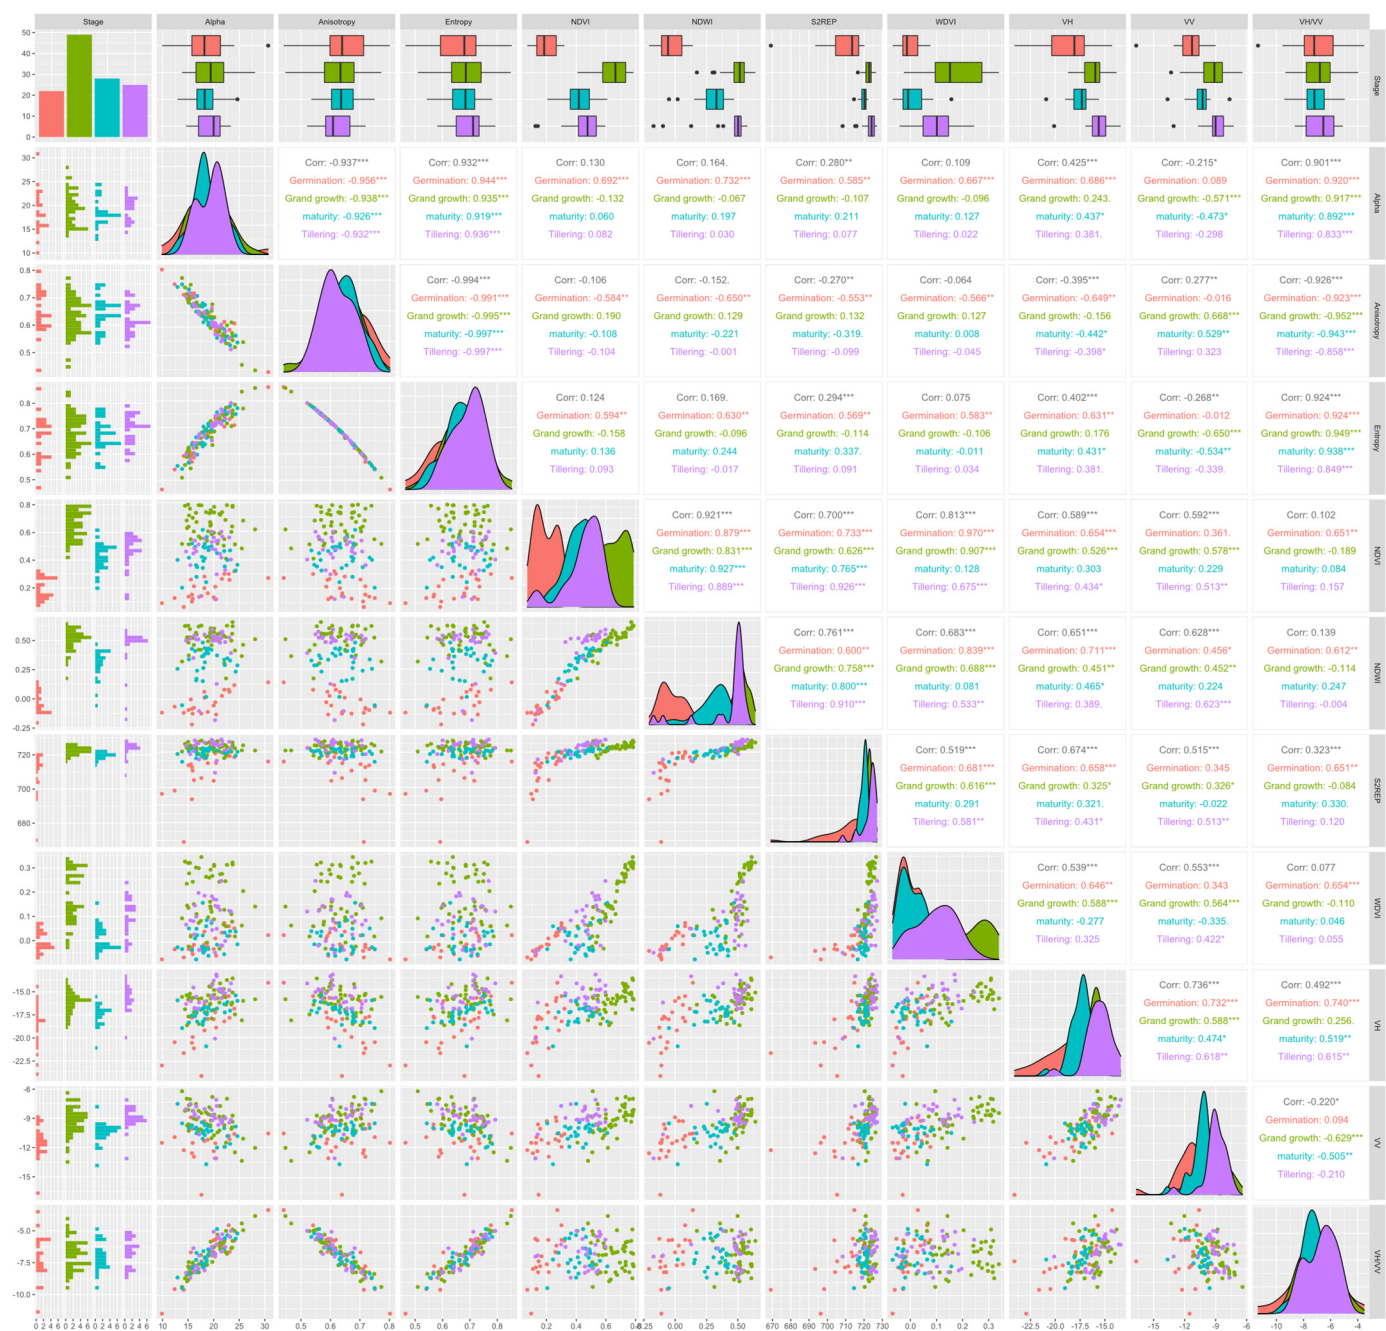

Note: ■ Germination ■ Tillering ■ Grand growth ■ Maturity

**Figure S1.** Association among the parameters in different phenological stages of sugarcane.

**Table S1.** Satge wise performance metrics of machine learning models

|               | Metrics     | Sentinel-1 |         |         |         | Sentinel-2 |         |         |         | Sentinel-1 and Sentinel-2 |         |         |         |
|---------------|-------------|------------|---------|---------|---------|------------|---------|---------|---------|---------------------------|---------|---------|---------|
|               |             | Stage 1    | Stage 2 | Stage 3 | Stage 4 | Stage 1    | Stage 2 | Stage 3 | Stage 4 | Stage 1                   | Stage 2 | Stage 3 | Stage 4 |
| Decision Tree | Accuracy    | 0.85       | 0.73    | 0.64    | 0.77    | 0.93       | 1.00    | 0.89    | 0.81    | 0.96                      | 0.92    | 0.83    | 0.84    |
|               | Recall      | 0.50       | 0.00    | 0.47    | 0.67    | 0.71       | 1.00    | 0.78    | 0.75    | 0.80                      | 1.00    | 0.69    | 1.00    |
|               | Specificity | 0.95       | 0.81    | 0.64    | 0.95    | 0.91       | 1.00    | 0.89    | 0.95    | 0.95                      | 1.00    | 0.74    | 1.00    |
|               | F1 score    | 0.33       | 0.01    | 0.54    | 0.40    | 0.83       | 1.00    | 0.82    | 0.55    | 0.89                      | 0.50    | 0.81    | 0.60    |

|               |             |      |      |      |      |      |      |      |      |      |      |      |      |
|---------------|-------------|------|------|------|------|------|------|------|------|------|------|------|------|
|               | MCC         | 0.28 | 0.15 | 0.26 | 0.32 | 0.81 | 1.00 | 0.75 | 0.46 | 0.87 | 0.55 | 0.71 | 0.59 |
| FRBS          | Accuracy    | 0.85 | 0.92 | 0.71 | 0.77 | 0.89 | 0.79 | 0.89 | 0.76 | 0.96 | 1.00 | 0.86 | 0.80 |
|               | Recall      | 0.50 | 1.00 | 0.53 | 0.67 | 0.67 | 0.43 | 0.73 | 1.00 | 0.80 | 1.00 | 0.73 | 1.00 |
|               | Specificity | 0.95 | 1.00 | 0.61 | 0.95 | 0.91 | 0.83 | 0.85 | 1.00 | 0.95 | 1.00 | 0.78 | 1.00 |
|               | F1 score    | 0.33 | 0.50 | 0.67 | 0.40 | 0.73 | 0.50 | 0.84 | 0.25 | 0.89 | 1.00 | 0.85 | 0.44 |
|               | MCC         | 0.28 | 0.55 | 0.49 | 0.32 | 0.66 | 0.38 | 0.79 | 0.33 | 0.87 | 1.00 | 0.76 | 0.47 |
| Logistics     | Accuracy    | 0.85 | 0.85 | 0.68 | 0.67 | 0.89 | 1.00 | 0.89 | 0.76 | 0.96 | 0.96 | 0.93 | 0.85 |
|               | Recall      | 0.50 | 0.33 | 0.50 | 0.00 | 0.63 | 1.00 | 0.73 | 1.00 | 0.80 | 1.00 | 0.85 | 0.80 |
|               | Specificity | 0.95 | 0.92 | 0.61 | 0.90 | 0.87 | 1.00 | 0.85 | 1.00 | 0.95 | 1.00 | 0.88 | 0.95 |
|               | F1 score    | 0.33 | 0.33 | 0.62 | 0.01 | 0.77 | 1.00 | 0.84 | 0.25 | 0.89 | 0.80 | 0.92 | 0.67 |
|               | MCC         | 0.28 | 0.25 | 0.40 | 0.17 | 0.74 | 1.00 | 0.79 | 0.33 | 0.87 | 0.80 | 0.86 | 0.58 |
| Naïve Bayes   | Accuracy    | 0.85 | 0.80 | 0.68 | 0.82 | 0.86 | 0.82 | 0.79 | 0.73 | 0.96 | 0.96 | 0.92 | 0.92 |
|               | Recall      | 0.50 | 0.29 | 0.63 | 0.63 | 0.56 | 0.50 | 0.63 | 0.50 | 0.80 | 0.75 | 0.91 | 1.00 |
|               | Specificity | 0.95 | 0.81 | 0.82 | 0.86 | 0.83 | 0.87 | 0.85 | 0.95 | 0.95 | 0.96 | 0.93 | 1.00 |
|               | F1 score    | 0.33 | 0.40 | 0.53 | 0.67 | 0.71 | 0.55 | 0.63 | 0.22 | 0.89 | 0.86 | 0.91 | 0.83 |
|               | MCC         | 0.28 | 0.34 | 0.30 | 0.55 | 0.68 | 0.44 | 0.48 | 0.15 | 0.87 | 0.85 | 0.84 | 0.80 |
| Neural Net    | Accuracy    | 0.81 | 0.85 | 0.73 | 0.71 | 0.89 | 1.00 | 0.96 | 0.84 | 0.96 | 0.96 | 0.86 | 0.84 |
|               | Recall      | 0.00 | 0.00 | 0.56 | 0.40 | 0.63 | 1.00 | 0.89 | 1.00 | 0.80 | 1.00 | 0.73 | 1.00 |
|               | Specificity | 0.95 | 0.96 | 0.64 | 0.86 | 0.87 | 1.00 | 0.94 | 1.00 | 0.95 | 1.00 | 0.78 | 1.00 |
|               | F1 score    | 0.01 | 0.01 | 0.69 | 0.33 | 0.77 | 1.00 | 0.94 | 0.60 | 0.89 | 0.80 | 0.85 | 0.60 |
|               | MCC         | 0.09 | 0.07 | 0.52 | 0.16 | 0.74 | 1.00 | 0.92 | 0.59 | 0.87 | 0.80 | 0.76 | 0.59 |
| Random Forest | Accuracy    | 0.92 | 0.80 | 0.69 | 0.88 | 0.86 | 0.96 | 0.89 | 0.76 | 0.96 | 1.00 | 0.93 | 0.88 |
|               | Recall      | 1.00 | 0.29 | 0.60 | 0.83 | 0.56 | 0.83 | 0.78 | 1.00 | 0.80 | 1.00 | 0.85 | 1.00 |
|               | Specificity | 1.00 | 0.81 | 0.78 | 0.95 | 0.83 | 0.95 | 0.89 | 1.00 | 0.95 | 1.00 | 0.88 | 1.00 |
|               | F1 score    | 0.67 | 0.40 | 0.57 | 0.77 | 0.71 | 0.91 | 0.82 | 0.25 | 0.89 | 1.00 | 0.92 | 0.73 |
|               | MCC         | 0.68 | 0.34 | 0.33 | 0.70 | 0.68 | 0.89 | 0.75 | 0.33 | 0.87 | 1.00 | 0.86 | 0.70 |
| SVM           | Accuracy    | 0.85 | 0.85 | 0.73 | 0.74 | 0.86 | 1.00 | 0.92 | 0.77 | 0.96 | 1.00 | 0.93 | 0.88 |
|               | Recall      | 0.50 | 0.00 | 0.56 | 0.50 | 0.56 | 1.00 | 0.88 | 0.67 | 0.80 | 1.00 | 0.85 | 1.00 |
|               | Specificity | 0.95 | 0.96 | 0.64 | 0.90 | 0.83 | 1.00 | 0.94 | 0.95 | 0.95 | 1.00 | 0.88 | 1.00 |
|               | F1 score    | 0.33 | 0.01 | 0.69 | 0.36 | 0.71 | 1.00 | 0.88 | 0.40 | 0.89 | 1.00 | 0.92 | 0.73 |
|               | MCC         | 0.28 | 0.07 | 0.52 | 0.23 | 0.68 | 1.00 | 0.82 | 0.32 | 0.87 | 1.00 | 0.86 | 0.70 |

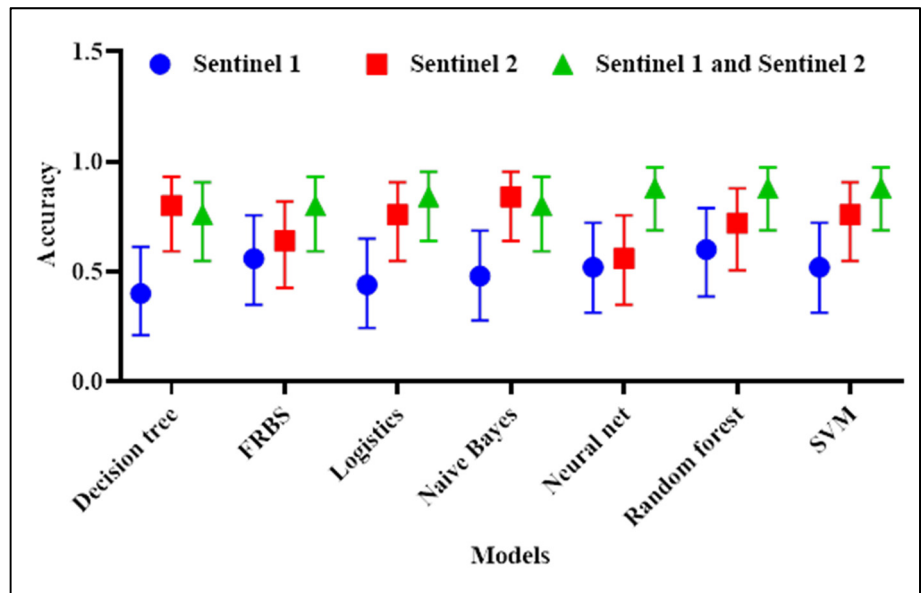

Figure S2. Accuracy of all classification models

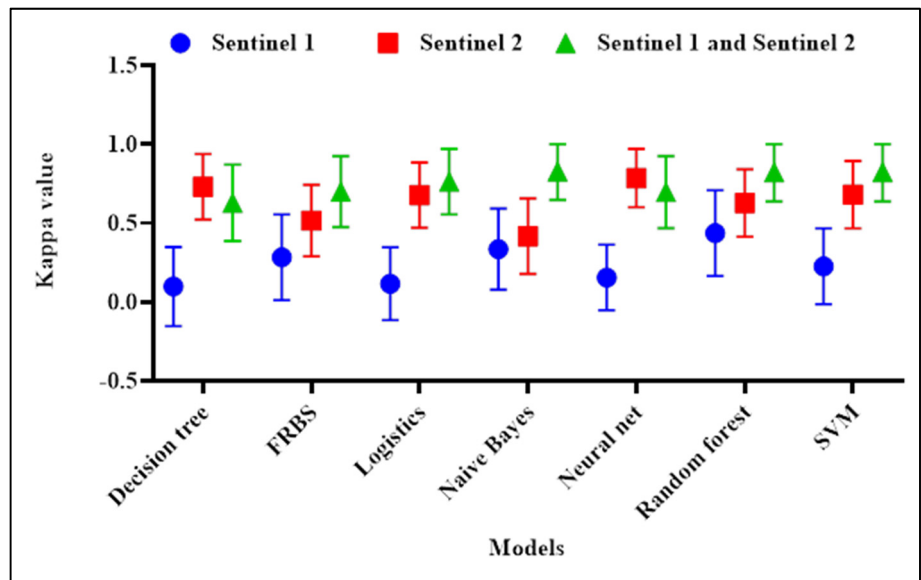

Figure S3. Kappa value of all classification models

Table S2: Pair wise comparisons of model's accuracy for Sentinel-1 data

|               | Decision tree | FRBS | Logistics | Naïve Bayes | Neural net | Random forest | SVM  |
|---------------|---------------|------|-----------|-------------|------------|---------------|------|
| Decision tree |               | 0.01 | <0.01     | 0.04        | 0.03       | <0.01         | 0.03 |
| FRBS          |               |      | 0.02      | 0.05        | 0.03       | 0.05          | 0.05 |
| Logistics     |               |      |           | 0.04        | 0.05       | 0.01          | 0.03 |
| Naïve Bayes   |               |      |           |             | 0.04       | 0.04          | 0.35 |
| Neural net    |               |      |           |             |            | 0.03          | 0.03 |
| Random forest |               |      |           |             |            |               | 0.03 |
| SVM           |               |      |           |             |            |               |      |

**Table S3:** Pair wise comparisons of model's accuracy for Sentinel-2 data

|               | Decision tree | FRBS  | Logistics | Naïve Bayes | Neural net | Random forest | SVM   |
|---------------|---------------|-------|-----------|-------------|------------|---------------|-------|
| Decision tree |               | <0.01 | 0.04      | <0.01       | 0.03       | 0.01          | 0.01  |
| FRBS          |               |       | <0.01     | <0.01       | 0.01       | 0.03          | 0.03  |
| Logistics     |               |       |           | <0.01       | 0.02       | 0.05          | 0.29  |
| Naïve Bayes   |               |       |           |             | <0.01      | <0.01         | <0.01 |
| Neural net    |               |       |           |             |            | 0.01          | 0.03  |
| Random forest |               |       |           |             |            |               | 0.04  |
| SVM           |               |       |           |             |            |               |       |

**Table S4:** Pair wise comparisons of model's accuracy for Sentinel-1 and Sentinel-2 data

|               | Decision tree | FRBS | Logistics | Naïve Bayes | Neural net | Random forest | SVM   |
|---------------|---------------|------|-----------|-------------|------------|---------------|-------|
| Decision tree |               | 0.01 | 0.02      | 0.01        | <0.01      | <0.01         | <0.01 |
| FRBS          |               |      | 0.13      | 0.05        | 0.03       | 0.03          | 0.04  |
| Logistics     |               |      |           | 0.05        | 0.02       | 0.03          | 0.03  |
| Naïve Bayes   |               |      |           |             | 0.04       | 0.04          | 0.03  |
| Neural net    |               |      |           |             |            | 0.18          | 0.15  |
| Random forest |               |      |           |             |            |               | 0.21  |
| SVM           |               |      |           |             |            |               |       |

**Table S5:** Pair wise comparisons of model's kappa value for Sentinel-1 data

|               | Decision tree | FRBS  | Logistics | Naïve Bayes | Neural net | Random forest | SVM   |
|---------------|---------------|-------|-----------|-------------|------------|---------------|-------|
| Decision tree |               | <0.01 | 0.05      | <0.01       | 0.01       | <0.01         | <0.01 |
| FRBS          |               |       | <0.01     | 0.05        | <0.01      | <0.01         | 0.02  |
| Logistics     |               |       |           | <0.01       | 0.07       | <0.01         | <0.01 |
| Naïve Bayes   |               |       |           |             | <0.01      | <0.01         | <0.01 |
| Neural net    |               |       |           |             |            | <0.01         | <0.01 |
| Random forest |               |       |           |             |            |               | <0.01 |
| SVM           |               |       |           |             |            |               |       |

**Table S6:** Pair wise comparisons of model's kappa value for Sentinel-2 data

|               | Decision tree | FRBS  | Logistics | Naïve Bayes | Neural net | Random forest | SVM   |
|---------------|---------------|-------|-----------|-------------|------------|---------------|-------|
| Decision tree |               | <0.01 | <0.01     | <0.01       | 0.03       | <0.01         | <0.01 |
| FRBS          |               |       | <0.01     | <0.01       | <0.01      | <0.01         | <0.01 |
| Logistics     |               |       |           | <0.01       | <0.01      | 0.04          | 0.13  |
| Naïve Bayes   |               |       |           |             | <0.01      | <0.01         | <0.01 |
| Neural net    |               |       |           |             |            | <0.01         | 0.01  |
| Random forest |               |       |           |             |            |               | 0.02  |
| SVM           |               |       |           |             |            |               |       |

**Table S7:** Pair wise comparisons of model's kappa value for Sentinel-1 and Sentinel-2 data

|               | Decision tree | FRBS | Logistics | Naïve Bayes | Neural net | Random forest | SVM   |
|---------------|---------------|------|-----------|-------------|------------|---------------|-------|
| Decision tree |               | 0.02 | <0.01     | <0.01       | <0.01      | <0.01         | <0.01 |
| FRBS          |               |      | 0.04      | <0.01       | 0.08       | <0.01         | <0.01 |
| Logistics     |               |      |           | 0.03        | 0.02       | 0.01          | 0.01  |
| Naïve Bayes   |               |      |           |             | <0.01      | 0.09          | 0.07  |
| Neural net    |               |      |           |             |            | 0.03          | 0.03  |
| Random forest |               |      |           |             |            |               | 0.12  |
| SVM           |               |      |           |             |            |               |       |

**Table S8:** Pair wise comparisons of data for based on decision tree model's accuracy

|                           | Sentinel 1 | Sentinel 2 | Sentinel 1 and Sentinel 2 |
|---------------------------|------------|------------|---------------------------|
| Sentinel 1                |            | <0.01      | <0.01                     |
| Sentinel 2                |            |            | <0.01                     |
| Sentinel 1 and Sentinel 2 |            |            | <0.01                     |

**Table S9:** Pair wise comparisons of data based on FRBS model's accuracy

|                           | Sentinel 1 | Sentinel 2 | Sentinel 1 and Sentinel 2 |
|---------------------------|------------|------------|---------------------------|
| Sentinel 1                |            | <0.01      | <0.01                     |
| Sentinel 2                |            |            | <0.01                     |
| Sentinel 1 and Sentinel 2 |            |            | <0.01                     |

**Table S10:** Pair wise comparisons of data based on Logistic tree model's accuracy

|                           | Sentinel 1 | Sentinel 2 | Sentinel 1 and Sentinel 2 |
|---------------------------|------------|------------|---------------------------|
| Sentinel 1                |            | <0.01      | <0.01                     |
| Sentinel 2                |            |            | <0.01                     |
| Sentinel 1 and Sentinel 2 |            |            | <0.01                     |

**Table S11:** Pair wise comparisons of data based on naïve bayes model's accuracy

|                           | Sentinel 1 | Sentinel 2 | Sentinel 1 and Sentinel 2 |
|---------------------------|------------|------------|---------------------------|
| Sentinel 1                |            | <0.01      | <0.01                     |
| Sentinel 2                |            |            | <0.01                     |
| Sentinel 1 and Sentinel 2 |            |            | <0.01                     |

**Table S12:** Pair wise comparisons of data based on neural net model's accuracy

|                           | Sentinel<br>1 | Sentinel<br>2 | Sentinel 1 and<br>Sentinel 2 |
|---------------------------|---------------|---------------|------------------------------|
| Sentinel 1                |               | <0.01         | <0.01                        |
| Sentinel 2                |               |               | <0.01                        |
| Sentinel 1 and Sentinel 2 |               |               | <0.01                        |

**Table S13:** Pair wise comparisons of data based on random forest model's accuracy

|                           | Sentinel<br>1 | Sentinel<br>2 | Sentinel 1 and<br>Sentinel 2 |
|---------------------------|---------------|---------------|------------------------------|
| Sentinel 1                |               | <0.01         | <0.01                        |
| Sentinel 2                |               |               | <0.01                        |
| Sentinel 1 and Sentinel 2 |               |               | <0.01                        |

**Table S14:** Pair wise comparisons of data based on SVM model's accuracy

|                           | Sentinel<br>1 | Sentinel<br>2 | Sentinel 1 and<br>Sentinel 2 |
|---------------------------|---------------|---------------|------------------------------|
| Sentinel 1                |               | <0.01         | <0.01                        |
| Sentinel 2                |               |               | <0.01                        |
| Sentinel 1 and Sentinel 2 |               |               | <0.01                        |

**Table S15:** Pair wise comparisons of data for based on decision tree model's kappa value

|                           | Sentinel<br>1 | Sentinel<br>2 | Sentinel 1 and<br>Sentinel 2 |
|---------------------------|---------------|---------------|------------------------------|
| Sentinel 1                |               | <0.01         | <0.01                        |
| Sentinel 2                |               |               | <0.01                        |
| Sentinel 1 and Sentinel 2 |               |               | <0.01                        |

**Table S16:** Pair wise comparisons of data based on FRBS model's kappa value

|                           | Sentinel<br>1 | Sentinel<br>2 | Sentinel 1 and<br>Sentinel 2 |
|---------------------------|---------------|---------------|------------------------------|
| Sentinel 1                |               | <0.01         | <0.01                        |
| Sentinel 2                |               |               | <0.01                        |
| Sentinel 1 and Sentinel 2 |               |               | <0.01                        |

**Table S17:** Pair wise comparisons of data based on Logistic tree model's kappa value

|                           | Sentinel<br>1 | Sentinel<br>2 | Sentinel 1 and<br>Sentinel 2 |
|---------------------------|---------------|---------------|------------------------------|
| Sentinel 1                |               | <0.01         | <0.01                        |
| Sentinel 2                |               |               | <0.01                        |
| Sentinel 1 and Sentinel 2 |               |               | <0.01                        |

**Table S18:** Pair wise comparisons of data based on naïve bayes model's kappa value

|                           | Sentinel<br>1 | Sentinel<br>2 | Sentinel 1 and<br>Sentinel 2 |
|---------------------------|---------------|---------------|------------------------------|
| Sentinel 1                |               | <0.01         | <0.01                        |
| Sentinel 2                |               |               | <0.01                        |
| Sentinel 1 and Sentinel 2 |               |               | <0.01                        |

**Table S19:** Pair wise comparisons of data based on neural net model's kappa value

|                           | Sentinel<br>1 | Sentinel<br>2 | Sentinel 1 and<br>Sentinel 2 |
|---------------------------|---------------|---------------|------------------------------|
| Sentinel 1                |               | <0.01         | <0.01                        |
| Sentinel 2                |               |               | <0.01                        |
| Sentinel 1 and Sentinel 2 |               |               | <0.01                        |

**Table S20:** Pair wise comparisons of data based on random forest model's kappa value

|            | Sentinel<br>1 | Sentinel<br>2 | Sentinel 1 and<br>Sentinel 2 |
|------------|---------------|---------------|------------------------------|
| Sentinel 1 |               | <0.01         | <0.01                        |
| Sentinel 2 |               |               | <0.01                        |

|                           |       |
|---------------------------|-------|
| Sentinel 1 and Sentinel 2 | <0.01 |
|---------------------------|-------|

**Table S21:** Pair wise comparisons of data based on SVM model's kappa value

|                           | Sentinel<br>1 | Sentinel<br>2 | Sentinel 1 and<br>Sentinel 2 |
|---------------------------|---------------|---------------|------------------------------|
| Sentinel 1                |               | <0.01         | <0.01                        |
| Sentinel 2                |               |               | <0.01                        |
| Sentinel 1 and Sentinel 2 |               |               | <0.01                        |
